# Supplementary material for: Physical and chemical properties of the soils in selected communal property associations of South Africa
Source: PeerJ. 2022 Oct 19;10:e13960. doi: 10.7717/peerj.13960 (PMC9753764; doi:10.7717/peerj.13960)
Supplement: Supplemental Information 1 [file peerj-10-13960-s001.xlsx]

## Sheet: Sheet1
Soil type	Depth	pH	P	Resistan	OrgC	Acidity
BelaBela	top	5.25	8.78	1744	1.48	0.021
BelaBela	top	5.27	8.68	1740	1.49	0.018
BelaBela	top	5.23	8.76	1738	1.5	0.022
Ramorula	top	4.44	12.88	2124	1.2	0.138
Ramorula	top	4.36	12.82	2120	1.22	0.138
Ramorula	top	4.34	12.88	2116	1.2	0.144
Mawela	top	4.85	2.56	2880	1.16	0.03
Mawela	top	4.85	2.59	2878	1.18	0.032
Mawela	top	4.85	2.57	2882	1.14	0.028
Moretele	top	8	5.23	2458	0.72	0.012
Moretele	top	6	5.23	2462	0.68	0.01
Moretele	top	4	5.17	2460	0.58	0.008
