# Supplementary material for: Physical and chemical properties of the soils in selected communal property associations of South Africa
Source: PeerJ. 2022 Oct 19;10:e13960. doi: 10.7717/peerj.13960 (PMC9753764; doi:10.7717/peerj.13960)
Supplement: Supplemental Information 2 [file peerj-10-13960-s002.xlsx]

## Sheet: Sheet1
Soil type	Depth	pH	P	Resistan	OrgC	Acidity
BelaBela	Sub	5.18	0.43	2122	0.91	0.019
BelaBela	Sub	5.16	0.41	2121	0.89	0.019
BelaBela	Sub	5.23	0.39	2117	0.96	0.022
Ramorula	Sub	4.69	1.58	3640	0.42	0.088
Ramorula	Sub	4.68	1.59	3639	0.39	0.081
Ramorula	Sub	4.7	1.6	3641	0.42	0.086
Mawela	Sub	4.9	0.33	2954	0.68	0.033
Mawela	Sub	4.91	0.29	2947	0.75	0.028
Mawela	Sub	4.86	0.34	2949	0.73	0.029
Moretele	Sub	7.17	1.15	1826	0.52	0.031
Moretele	Sub	7.13	1.09	1831	0.53	0.038
Moretele	Sub	7.12	1.12	1833	0.48	0.036
