# Supplementary material for: Physical and chemical properties of the soils in selected communal property associations of South Africa
Source: PeerJ. 2022 Oct 19;10:e13960. doi: 10.7717/peerj.13960 (PMC9753764; doi:10.7717/peerj.13960)
Supplement: Supplemental Information 3 [file peerj-10-13960-s003.xlsx]

## Sheet: Sheet1
Soil type	Depth	Sand	Silt	Clay
BelaBela	top	62	4	24
BelaBela	top	68	8	20
BelaBela	top	74	12	28
Ramorula	top	76	6	20
Ramorula	top	78	4	20
Ramorula	top	74	2	20
Mawela	top	74	4	24
Mawela	top	74	8	20
Mawela	top	68	6	22
Moretele	top	92	6	12
Moretele	top	82	4	10
Moretele	top	78	2	14
		84	4	12
