# Supplementary material for: Physical and chemical properties of the soils in selected communal property associations of South Africa
Source: PeerJ. 2022 Oct 19;10:e13960. doi: 10.7717/peerj.13960 (PMC9753764; doi:10.7717/peerj.13960)
Supplement: Supplemental Information 4 [file peerj-10-13960-s004.xlsx]

## Sheet: Sheet1
Soil type	Depth	Sand	Silt	Clay
BelaBela	Sub	58	10	34
BelaBela	Sub	62	11	26
BelaBela	Sub	60	9	30
Ramorula	Sub	81	4	25
Ramorula	Sub	76	6	20
Ramorula	Sub	71	2	15
Mawela	Sub	72	10	26
Mawela	Sub	64	6	20
Mawela	Sub	68	8	26
Moretele	Sub	78	6	14
Moretele	Sub	76	8	18
Moretele	Sub	86	4	10
