# Supplementary material for: Physical and chemical properties of the soils in selected communal property associations of South Africa
Source: PeerJ. 2022 Oct 19;10:e13960. doi: 10.7717/peerj.13960 (PMC9753764; doi:10.7717/peerj.13960)
Supplement: Supplemental Information 5 [file peerj-10-13960-s005.xlsx]

## Sheet: Sheet1
Soil type	Depth	Cl	SO4	Fe	Mn	Cu	Zn	N-NO3	N-NH4	K	Ca	Mg	Na
BelaBela	top	38	82.9	5.47	39.8	2.63	3.66	2.38	4.45	391	1421	477	7.49
BelaBela	top	43	81.9	5.43	40.9	2.59	3.36	2.43	4.5	395	1422	484	7.37
BelaBela	top	42	83.9	5.39	41.7	2.61	2.82	2.39	4.49	396	1417	479	7.31
Ramorula	top	42.17	72.9	12	21.4	0.77	1.2	0.99	3.01	127	332	128	8.48
Ramorula	top	42.19	73.9	11.5	22	0.72	0.9	0.98	2.99	126	337	128	8.5
Ramorula	top	42.24	71.9	11.9	21.1	0.73	1.2	0.94	3.01	122	330	131	8.49
Mawela	top	17.7	35.3	5.22	22.3	2.04	1.79	0.43	3.73	221	679	288	5.78
Mawela	top	18.2	37.3	5.2	22.8	2.03	1.83	0.37	3.76	222	678	286	5.76
Mawela	top	18.1	33.3	5.24	22.7	2.02	1.87	0.37	3.7	220	680	290	5.8
Moretele	top	18	32.3	2.11	14.2	0.31	0.92	1.11	3.46	120	847	94	4.95
Moretele	top	16	35.1	2.09	14.8	0.3	0.98	1.05	3.44	124	845	92	4.97
Moretele	top	14	29.2	2.07	14.8	0.32	0.92	1.05	3.48	116	843	108	4.93
