# Supplementary material for: Physical and chemical properties of the soils in selected communal property associations of South Africa
Source: PeerJ. 2022 Oct 19;10:e13960. doi: 10.7717/peerj.13960 (PMC9753764; doi:10.7717/peerj.13960)
Supplement: Supplemental Information 6 [file peerj-10-13960-s006.xlsx]

## Sheet: Sheet1
Soil type	Depth	Cl	SO4	Fe	Mn	Cu	Zn	N-NO3	N-NH4	K	Ca	Mg	Na
BelaBela	Sub	41.1	76.2	3.92	7.23	3.52	1.35	0.65	2.34	306	1338	355	7.38
BelaBela	Sub	41.4	74.2	3.98	7.25	3.56	1.35	0.65	2.31	302	1336	365	7.38
BelaBela	Sub	41.1	78.2	3.98	7.33	3.54	1.41	0.65	2.37	298	1346	357	7.41
Ramorula	Sub	26.4	41.8	7.2	7.56	0.75	0.44	1.98	2.28	111	357	154	14.7
Ramorula	Sub	28	41.2	7.1	7.6	0.77	0.44	1.98	2.34	109	349	156	14.7
Ramorula	Sub	24.2	41.8	7.6	7.58	0.85	0.38	1.98	2.28	107	353	158	15.3
Mawela	Sub	66.4	86.5	3.35	4.36	2.26	0.38	0.92	3.15	147	618	294	7.84
Mawela	Sub	68.4	83.5	3.35	4.38	2.28	0.44	0.98	3.27	145	620	286	7.84
Mawela	Sub	64.4	87.7	3.41	4.28	2.24	0.5	0.92	3.27	140	616	284	7.84
Moretele	Sub	40.2	85.4	1.48	6.21	0.47	0.44	1.09	2.86	152	1628	142	7.2
Moretele	Sub	41.1	82.1	1.44	6.25	0.39	0.5	1.14	2.88	148	1638	136	7.18
Moretele	Sub	42	86	1.52	6.23	0.43	0.38	1.04	2.78	147	1624	136	7.25
